# Supplementary material for: Lanthanide-pyridyl-2,5-dicarboxylate N-oxide frameworks with rutile topology
Source: Royal Society of Chemistry journal article supplement (doi:10.1039/c1ce05698k), 2011-10-28
Supplement: c1ce05698k.pdf [file c1ce05698k.pdf]

## Lanthanide-pyridyl-2,5-dicarboxylate N-oxide frameworks with rutile topology

Hao-Ling Sun<sup>a\*</sup>, Xiang-Li Wang<sup>a</sup>, Li Jia<sup>a</sup>, Wei Cao<sup>a</sup>, Ke-Zhi Wang<sup>a</sup> and Miao Du<sup>b</sup>

<sup>a</sup> Department of Chemistry, Beijing Normal University, Beijing 100875, P. R. China

E-mail: [haolingsun@bnu.edu.cn](mailto:haolingsun@bnu.edu.cn);

<sup>b</sup> College of Chemistry, Tianjin Key Laboratory of Structure and Performance for Functional Molecule, Tianjin Normal University, Tianjin 300387, P. R. China.

**Table S1.** Hydrogen bond lengths (Å) and angles (deg) associated with water molecules for **1**, **2**, **3** and **4**.

| D-H...A     | d(H...A) | d(D...A) | <(D-H...A) | Symmetry code      |
|-------------|----------|----------|------------|--------------------|
| <b>1</b>    |          |          |            |                    |
| O7-H7A...O4 | 1.921    | 2.863    | 176.36     | x-1, -y+1/2, z-1/2 |
| O7-H7B...O6 | 1.803    | 2.747    | 170.00     | x, -y+1/2, z+1/2   |
| <b>2</b>    |          |          |            |                    |
| O7-H7A...O4 | 2.139    | 2.946    | 144.56     | x-1, -y+1/2, z-1/2 |
| O7-H7A...O2 | 2.182    | 2.873    | 130.37     | x, -y+1/2, z-1/2   |
| O7-H7B...O6 | 1.837    | 2.764    | 179.67     | x, -y+1/2, z+1/2   |
| <b>3</b>    |          |          |            |                    |
| O7-H7A...O4 | 2.225    | 2.953    | 135.13     | x-1, -y+1/2, z-1/2 |
| O7-H7A...O2 | 2.073    | 2.857    | 141.77     | x, -y+1/2, z-1/2   |
| O7-H7B...O6 | 1.839    | 2.758    | 175.35     | x, -y+1/2, z+1/2   |
| <b>4</b>    |          |          |            |                    |
| O7-H7A...O4 | 2.134    | 2.949    | 143.83     | x-1, -y+1/2, z-1/2 |
| O7-H7A...O2 | 2.124    | 2.851    | 132.90     | x, -y+1/2, z-1/2   |
| O7-H7B...O6 | 1.820    | 2.764    | 172.06     | x, -y+1/2, z+1/2   |

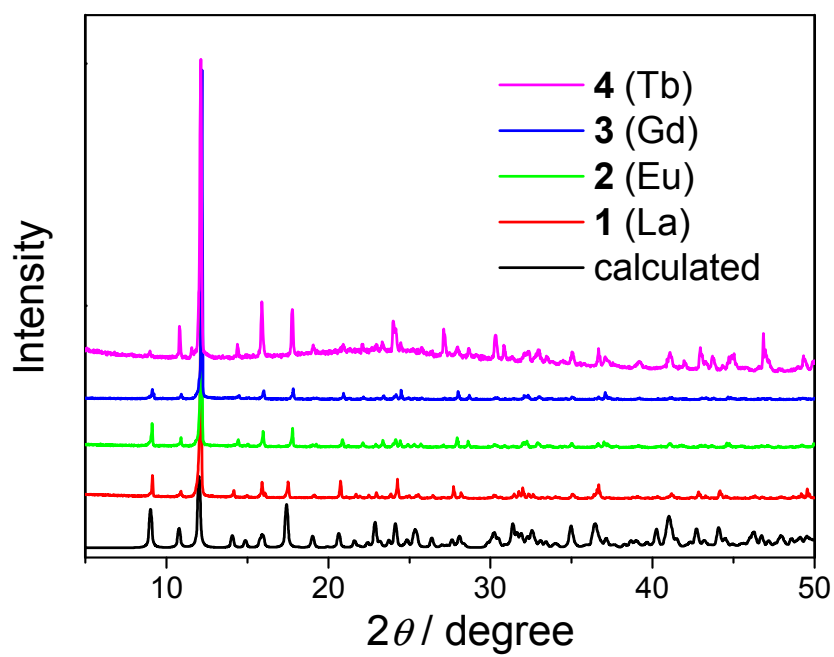

**Fig. S1** Comparison of the powder XRD patterns of **1**, **2**, **3**, **4** and the calculated.

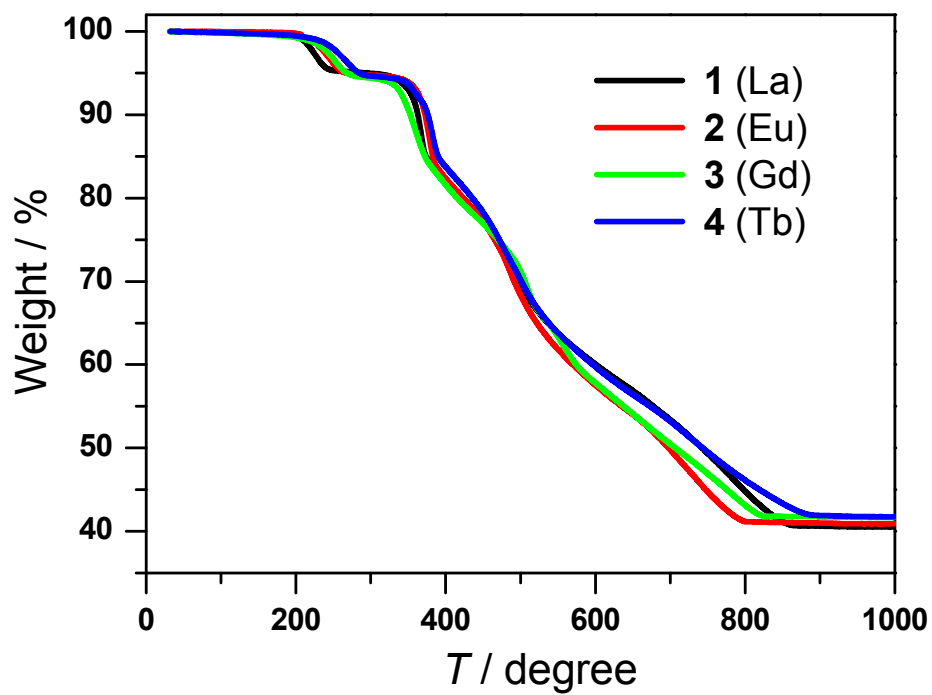

Fig. S2 TGA data of 1, 2, 3, and 4.

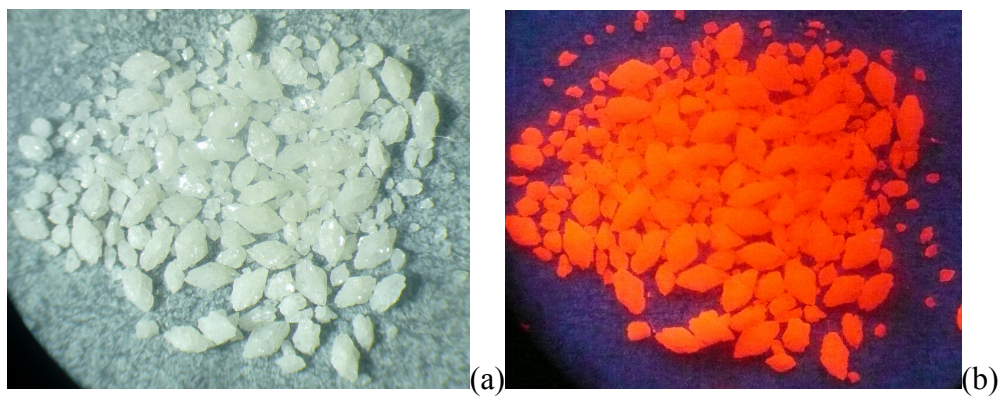

**Fig. S3** The pictures of the crystals of **2** without (a) or with UV light (b).

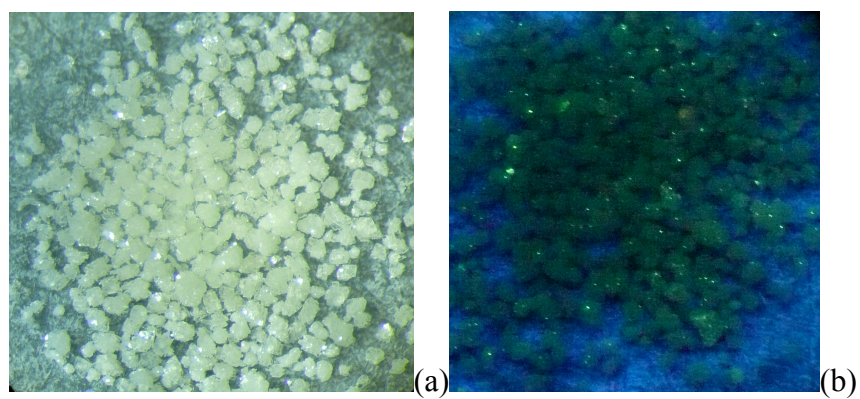

**Fig. S4** The pictures of the crystals of **3** without (a) or with UV light (b).

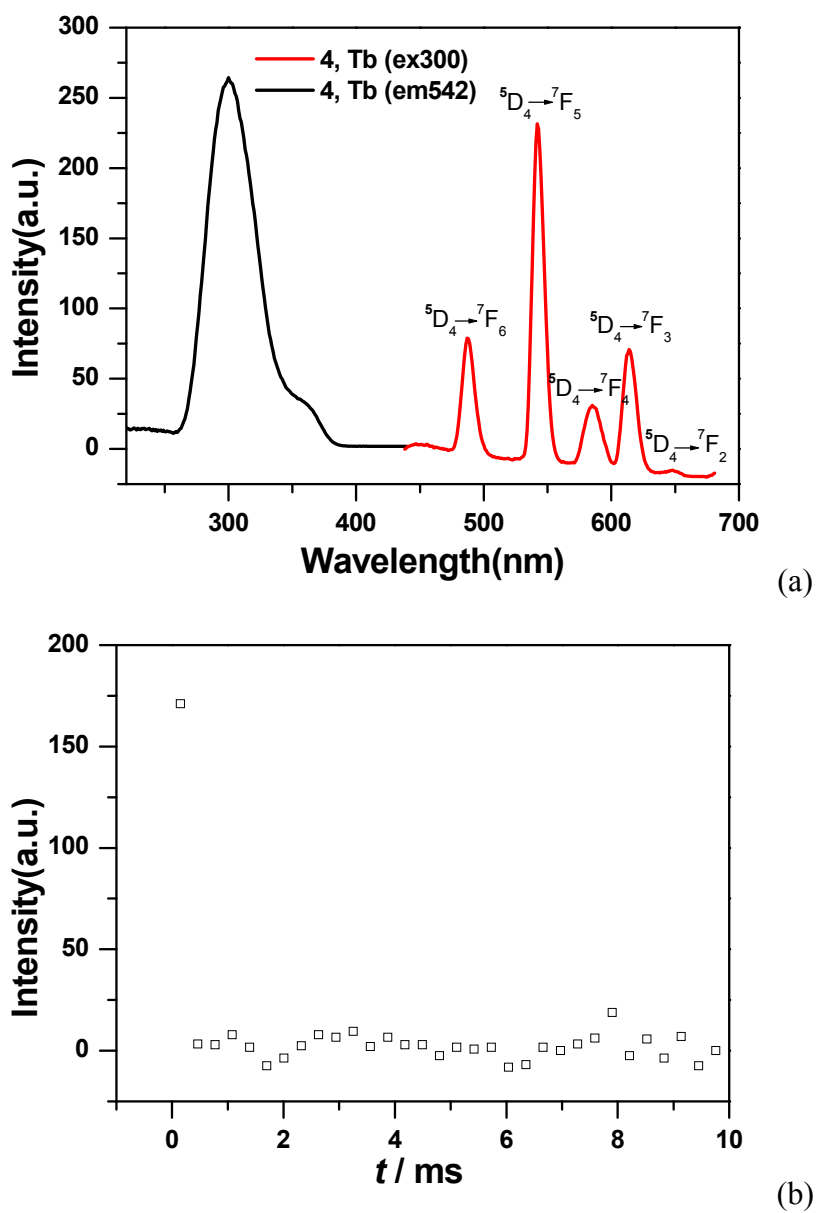

**Fig. S5** Solid-state excitation/emission spectra (a) and the emission decay pattern (b)

of 4.
